# Supplementary material
Source: Springer Nature journal article supplement (https://www.springermedizin.de/resource/supplementary/12902_2014_260_MOESM2_ESM.pdf/9515894)

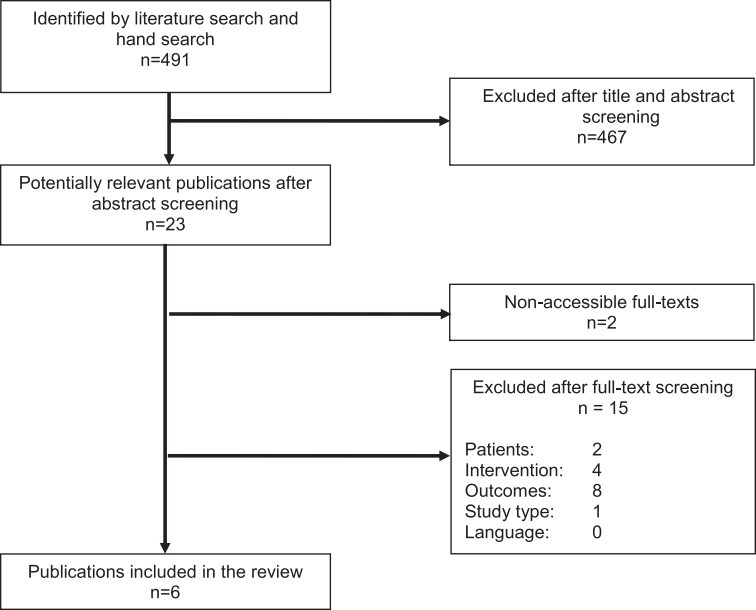

Supplement: MOESM2 [file 9515894]
